# Supplementary material for: Synthesis and Structural Characterization of a New 1,2,3-Triazole Derivative of Pentacyclic Triterpene
Source: MDPI journal article supplement (doi:10.3390/cryst12030422), 2022-03-18

# Synthesis and Structural Characterization of a New 1,2,3-Triazole Derivative of Pentacyclic Triterpene

Ewa Bębenek <sup>1,\*</sup>, Monika Kadela-Tomanek <sup>1</sup>, Elwira Chrobak <sup>1,\*</sup>, Maria Jastrzębska <sup>2</sup> and Maria Książek <sup>3</sup>

<sup>1</sup> Department of Organic Chemistry, Faculty of Pharmaceutical Sciences in Sosnowiec, Medical University of Silesia, Katowice, 4 Jagiellońska Str., 41-200 Sosnowiec, Poland; mkadela@sum.edu.pl

<sup>2</sup> Silesian Center for Education and Interdisciplinary Research, Institute of Physics, University of Silesia, 75 Pułku Piechoty Str.1a, 41-500 Chorzów, Poland; maria.jastrzebska@us.edu.pl

<sup>3</sup> Faculty of Science and Technology, Institute of Physics, University of Silesia in Katowice, 75 Pułku Piechoty Str.1a, 41-500 Chorzów, Poland; maria.ksiazek@us.edu.pl

\* Correspondence: ebebenek@sum.edu.pl (E.B.); echrobak@sum.edu.pl (E.C.); Tel.: +48-32-364-16-66(E.B.)

**Citation:** Bębenek, E.; Kadela-Tomanek, M.; Chrobak, E.; Jastrzębska, M.; Książek, M. Synthesis and Structural Characterization of a New 1,2,3-Triazole Derivative of Pentacyclic Triterpene. *Crystals* **2022**, *12*, 422. <https://doi.org/10.3390/cryst12030422>

Academic Editor: Waldemar Maniukiewicz

Received: 25 February 2022

Accepted: 14 March 2022

Published: 18 March 2022

**Publisher's Note:** MDPI stays neutral with regard to jurisdictional claims in published maps and institutional affiliations.

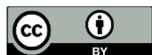

**Copyright:** © 2022 by the authors. Licensee MDPI, Basel, Switzerland. This article is an open access article distributed under the terms and conditions of the Creative Commons Attribution (CC BY) license (<https://creativecommons.org/licenses/by/4.0/>).

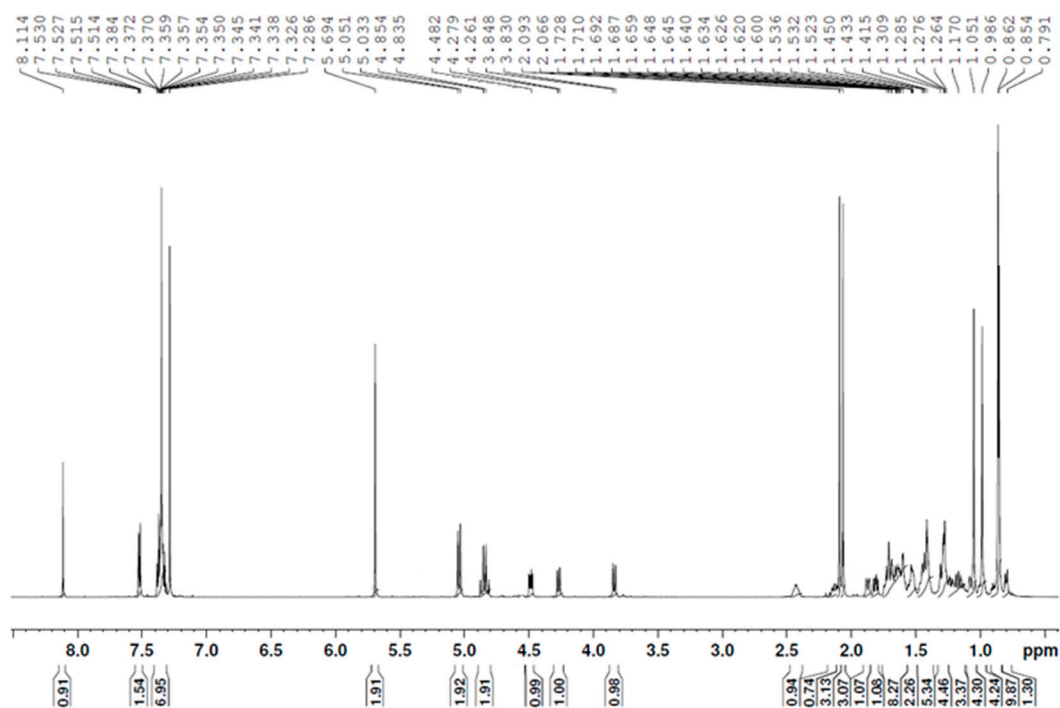

**Figure S1.** <sup>1</sup>H NMR, 3,28-O,O'-diacetyl-30-(1-phenylthiomethyl-1H-1,2,3-triazol-4-yl)carbonylbetulin 4.

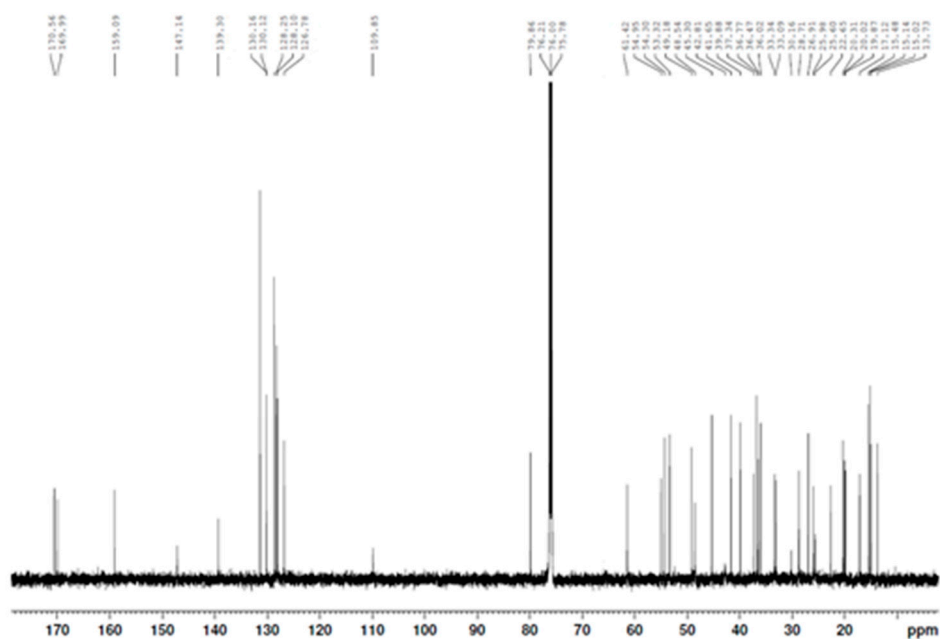

**Figure S2.** <sup>13</sup>C NMR, 3,28-O,O'-diacetyl-30-(1-phenylthiomethyl-1H-1,2,3-triazol-4-yl)carbonylbetulin 4.

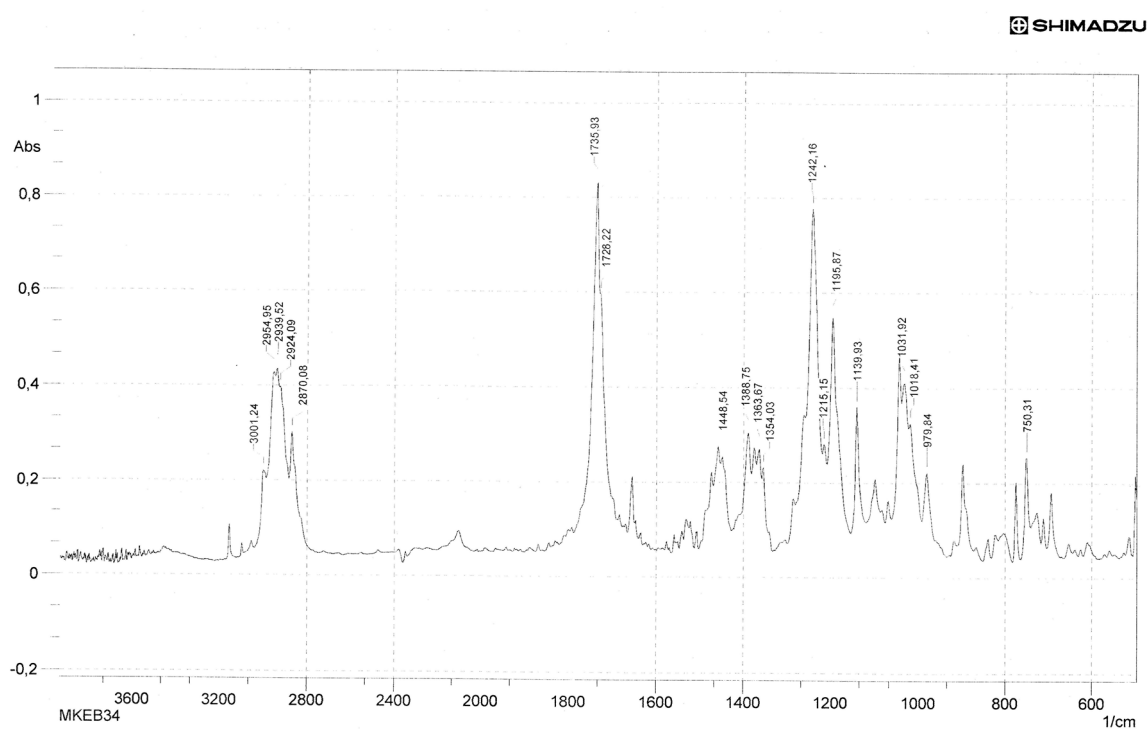

Figure S3. IR, 3,28-O,O'-diacetyl-30-(1-phenylthiomethyl-1H-1,2,3-triazol-4-yl)carbonylbetulin 4.

|               |                                   |            |               |
|---------------|-----------------------------------|------------|---------------|
| Analysis Name | D:\Data\PM_20171204\MK EB 34 Pa.d |            |               |
| Method        | low_mass.m                        | Operator   | KM            |
| Sample Name   | AN 40_18                          | Instrument | impact II     |
| Comment       |                                   |            | 1825265.10082 |

#### Acquisition Parameter

|             |          |                      |          |                  |           |
|-------------|----------|----------------------|----------|------------------|-----------|
| Source Type | APCI     | Ion Polarity         | Negative | Set Nebulizer    | 2.0 Bar   |
| Focus       | Active   | Set Capillary        | 4000 V   | Set Dry Heater   | 200 °C    |
| Scan Begin  | 100 m/z  | Set End Plate Offset | -500 V   | Set Dry Gas      | 5.0 l/min |
| Scan End    | 2000 m/z | Set Charging Voltage | 2000 V   | Set Divert Valve | Source    |
|             |          | Set Corona           | 2000 nA  | Set APCI Heater  | 450 °C    |

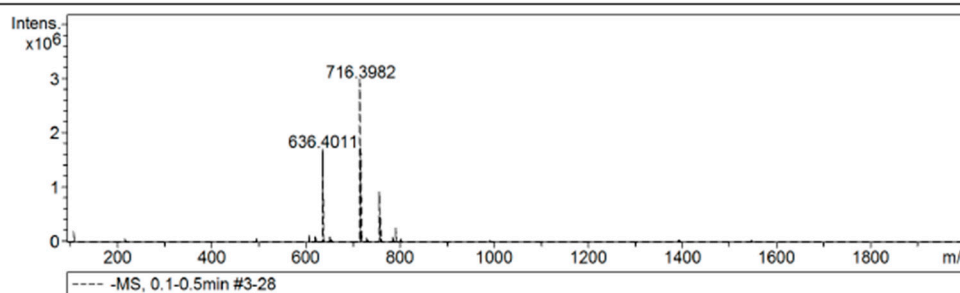

| # | m/z      | Res.  | S/N     | I       | I %   | FWHM   |
|---|----------|-------|---------|---------|-------|--------|
| 1 | 636.4011 | 44867 | 35549.0 | 1651740 | 56.3  | 0.0142 |
| 2 | 716.3982 | 38401 | 56744.8 | 2935886 | 100.0 | 0.0187 |
| 3 | 758.4196 | 44798 | 17168.0 | 933896  | 31.8  | 0.0169 |

Figure S4. HR-MS, 3,28-O,O'-diacetyl-30-(1-phenylthiomethyl-1H-1,2,3-triazol-4-yl)carbonylbetulin 4.

**Table S1.** Selected bond lengths (Å) for compounds 4.

| <b>Compound 4.</b>  |  |          |
|---------------------|--|----------|
| <b>Distance (Å)</b> |  |          |
| S1-C38              |  | 1.822(3) |
| S1-C39              |  | 1.782(3) |
| O1-C3               |  | 1.451(3) |
| O1-C33              |  | 1.340(3) |
| O2-C33              |  | 1.203(4) |
| O3-C28              |  | 1.453(3) |
| O3-C31              |  | 1.333(4) |
| O4-C31              |  | 1.194(4) |
| O5-C30              |  | 1.435(4) |
| O5-C35              |  | 1.342(3) |
| O6-C35              |  | 1.211(3) |
| N1-N2               |  | 1.305(4) |
| N1-C36              |  | 1.364(4) |
| N2-N3               |  | 1.348(3) |
| N3-C37              |  | 1.344(4) |
| N3-C38              |  | 1.461(4) |
| C18-C19             |  | 1.541(4) |
| C19-C20             |  | 1.511(4) |
| C19-C21             |  | 1.572(4) |
| C20-C29             |  | 1.330(4) |
| C20-C30             |  | 1.502(4) |
| C31-C32             |  | 1.493(4) |
| C35-C36             |  | 1.466(4) |
| C36-C37             |  | 1.372(4) |
| C39-C40             |  | 1.383(4) |
| C39-C44             |  | 1.387(4) |
| C40-C41             |  | 1.388(5) |
| C41-C42             |  | 1.379(5) |
| C42-C43             |  | 1.390(5) |
| C43-C44             |  | 1.376(4) |

**Table S2.** Selected angle (degree) for compounds 4.

| <b>Compound 4.</b>    |  |          |
|-----------------------|--|----------|
| <b>Angle (degree)</b> |  |          |
| C38-S1-C39            |  | 101.1(1) |
| C3-O1-C33             |  | 117.9(2) |
| C28-O3-C31            |  | 118.6(2) |
| C30-O5-C35            |  | 116.3(2) |
| N2-N1-C36             |  | 108.2(3) |
| N1-N2-N3              |  | 107.8(2) |
| N2-N3-C37             |  | 110.9(2) |
| N2-N3-C38             |  | 120.3(2) |
| C37-N3-C38            |  | 128.6(2) |
| O1-C3-C2              |  | 109.4(2) |
| O1-C3-C4              |  | 108.4(2) |
| C20-C19-C21           |  | 110.7(2) |

|                 |           |
|-----------------|-----------|
| C19-C20-C29     | 126.4(3)  |
| C19-C20-C30     | 110.9(2)  |
| C29-C20-C30     | 122.6(3)  |
| C19-C21-C22     | 106.0(2)  |
| O3-C28-C17      | 109.1(2)  |
| C39-S1-C38-N3   | 77.6(2)   |
| C38-S1-C39-C40  | -114.2(3) |
| C38-S1-C39-C44  | 66.1(3)   |
| C31-O3-C28-C17  | -125.0(3) |
| C28-O3-C31-C32  | -179.1(2) |
| N2-N1-C36-C35   | -178.9(3) |
| N1-N2-N3-C38    | -176.6(2) |
| C38-N3-C37-C36  | 175.4(3)  |
| N2-N3-C38-S1    | 107.4(3)  |
| C37-N3-C38-S1   | -67.8(3)  |
| C2-C1-C10-C5    | 51.0(3)   |
| C1-C2-C3-O1     | -178.6(2) |
| C1-C2-C3-C4     | 59.8(3)   |
| O1-C3-C4-C5     | -179.9(2) |
| C2-C3-C4-C5     | -57.8(3)  |
| C16-C17-C28-O3  | 67.9(3)   |
| C18-C17-C28-O3  | -171.5(2) |
| C22-C17-C28-O3  | -61.6(3)  |
| C21-C19-C20-C29 | 95.9(3)   |
| C21-C19-C20-C30 | -81.0(3)  |
| C20-C19-C21-C22 | -128.6(2) |
| C19-C21-C22-C17 | -27.3(3)  |
| S1-C39-C40-C41  | 178.4(2)  |
| S1-C39-C44-C43  | -178.2(2) |

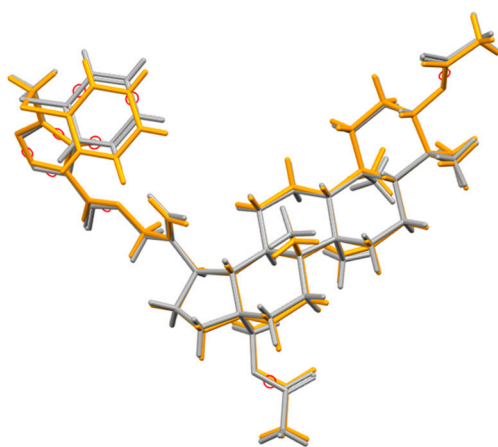

**Figure S5.** Atom by atom superimposition of X-ray structure (yellow) and calculate structure (grey).

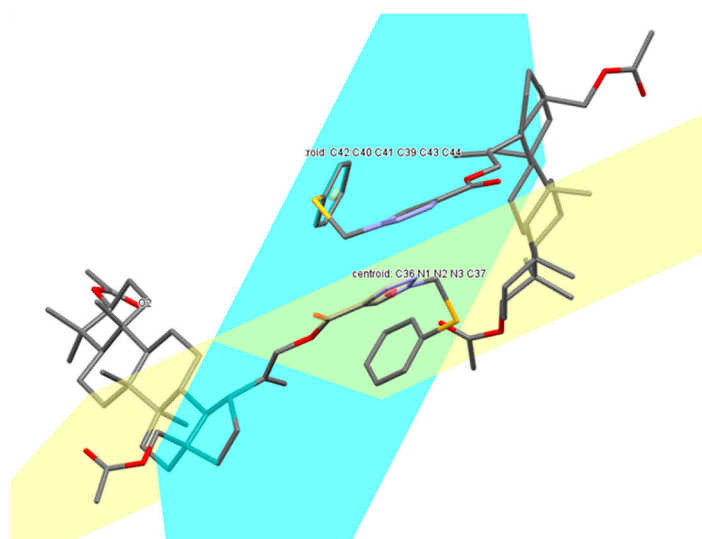

**Figure S6.** Intermolecular orientation of triazole and phenyl centroids showing  $\pi \cdots \pi$  interactions.

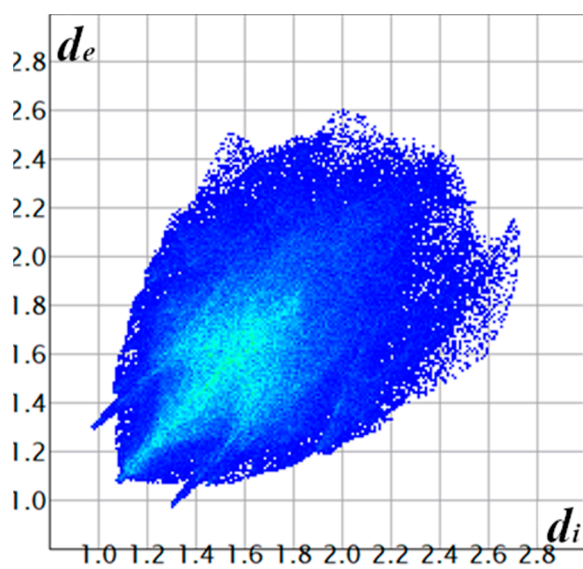

**Figure S7.** The full 2D fingerprint plot for 4.

## checkCIF/PLATON report

Structure factors have been supplied for datablock(s) shelx

THIS REPORT IS FOR GUIDANCE ONLY. IF USED AS PART OF A REVIEW PROCEDURE FOR PUBLICATION, IT SHOULD NOT REPLACE THE EXPERTISE OF AN EXPERIENCED CRYSTALLOGRAPHIC REFEREE.

No syntax errors found.      CIF dictionary      Interpreting this report

### Datablock: shelx

---

|                 |                                    |                          |
|-----------------|------------------------------------|--------------------------|
| Bond precision: | C-C = 0.0040 Å                     | Wavelength=1.54184       |
| Cell:           | a=9.4860 (1)<br>alpha=90           | b=13.9440 (2)<br>beta=90 |
| Temperature:    | c=30.2347 (4)<br>gamma=90<br>100 K |                          |

  

|                        | Calculated      | Reported        |
|------------------------|-----------------|-----------------|
| Volume                 | 3999.23 (9)     | 3999.23 (9)     |
| Space group            | P 21 21 21      | P 21 21 21      |
| Hall group             | P 2ac 2ab       | P 2ac 2ab       |
| Moiety formula         | C44 H61 N3 O6 S | C44 H61 N3 O6 S |
| Sum formula            | C44 H61 N3 O6 S | C44 H61 N3 O6 S |
| Mr                     | 760.02          | 760.01          |
| Dx, g cm <sup>-3</sup> | 1.262           | 1.262           |
| Z                      | 4               | 4               |
| Mu (mm <sup>-1</sup> ) | 1.131           | 1.131           |
| F000                   | 1640.0          | 1640.0          |
| F000'                  | 1645.85         |                 |
| h, k, lmax             | 11, 17, 37      | 11, 17, 36      |
| Nref                   | 7923 [ 4450]    | 7268            |
| Tmin, Tmax             | 0.947, 0.978    | 0.792, 1.000    |
| Tmin'                  | 0.696           |                 |

  

Correction method= # Reported T Limits: Tmin=0.792 Tmax=1.000  
AbsCorr = MULTI-SCAN

  

Data completeness= 1.63/0.92      Theta(max)= 72.488

  

|                                |                                  |
|--------------------------------|----------------------------------|
| R(reflections)= 0.0383 ( 7148) | wR2(reflections)= 0.1038 ( 7268) |
| S = 1.053                      | Npar= 494                        |

---

The following ALERTS were generated. Each ALERT has the format  
**test-name\_ALERT\_alert-type\_alert-level.**  
 Click on the hyperlinks for more details of the test.

---

● **Alert level C**

|                                                                 |              |
|-----------------------------------------------------------------|--------------|
| FIAT340_ALERT_3_C Low Bond Precision on C-C Bonds .....         | 0.00405 Ang. |
| FIAT911_ALERT_3_C Missing PCF Refl Between Thmin & STh/L= 0.600 | 81 Report    |

---

● **Alert level G**

|                                                                    |              |
|--------------------------------------------------------------------|--------------|
| FIAT480_ALERT_4_G Long H...A H-Bond Reported H34C ..S1 .           | 2.98 Ang.    |
| FIAT480_ALERT_4_G Long H...A H-Bond Reported H44 ..O6 .            | 2.65 Ang.    |
| FIAT791_ALERT_4_G Model has Chirality at C3 (Sohnke SpGr)          | S Verify     |
| FIAT791_ALERT_4_G Model has Chirality at C5 (Sohnke SpGr)          | R Verify     |
| FIAT791_ALERT_4_G Model has Chirality at C8 (Sohnke SpGr)          | R Verify     |
| FIAT791_ALERT_4_G Model has Chirality at C9 (Sohnke SpGr)          | S Verify     |
| FIAT791_ALERT_4_G Model has Chirality at C10 (Sohnke SpGr)         | R Verify     |
| FIAT791_ALERT_4_G Model has Chirality at C13 (Sohnke SpGr)         | R Verify     |
| FIAT791_ALERT_4_G Model has Chirality at C14 (Sohnke SpGr)         | R Verify     |
| FIAT791_ALERT_4_G Model has Chirality at C17 (Sohnke SpGr)         | S Verify     |
| FIAT791_ALERT_4_G Model has Chirality at C18 (Sohnke SpGr)         | S Verify     |
| FIAT791_ALERT_4_G Model has Chirality at C19 (Sohnke SpGr)         | R Verify     |
| FIAT883_ALERT_1_G No Info/Value for _atom_sites_solution_primary . | Please Do !  |
| FIAT912_ALERT_4_G Missing # of PCF Reflections Above STh/L= 0.600  | 96 Note      |
| FIAT941_ALERT_3_G Average HKL Measurement Multiplicity .....       | 4.6 Low      |
| FIAT965_ALERT_2_G The SHELXL WEIGHT Optimisation has not Converged | Please Check |
| FIAT978_ALERT_2_G Number C-C Bonds with Positive Residual Density. | 16 Info      |
| FIAT992_ALERT_5_G Rpd & Actual _reflms_number_gt Values Differ by  | 3 Check      |

---

- 0 **ALERT level A** = Most likely a serious problem - resolve or explain  
 0 **ALERT level B** = A potentially serious problem, consider carefully  
 2 **ALERT level C** = Check. Ensure it is not caused by an omission or oversight  
 18 **ALERT level G** = General information/check it is not something unexpected

- 1 **ALERT type 1** CIF construction/syntax error, inconsistent or missing data  
 2 **ALERT type 2** Indicator that the structure model may be wrong or deficient  
 3 **ALERT type 3** Indicator that the structure quality may be low  
 13 **ALERT type 4** Improvement, methodology, query or suggestion  
 1 **ALERT type 5** Informative message, check
-



It is advisable to attempt to resolve as many as possible of the alerts in all categories. Often the minor alerts point to easily fixed oversights, errors and omissions in your CIF or refinement strategy, so attention to these fine details can be worthwhile. In order to resolve some of the more serious problems it may be necessary to carry out additional measurements or structure refinements. However, the purpose of your study may justify the reported deviations and the more serious of these should normally be commented upon in the discussion or experimental section of a paper or in the "special\_details" fields of the CIF. checkCIF was carefully designed to identify outliers and unusual parameters, but every test has its limitations and alerts that are not important in a particular case may appear. Conversely, the absence of alerts does not guarantee there are no aspects of the results needing attention. It is up to the individual to critically assess their own results and, if necessary, seek expert advice.

#### **Publication of your CIF in IUCr journals**

A basic structural check has been run on your CIF. These basic checks will be run on all CIFs submitted for publication in IUCr journals (*Acta Crystallographica*, *Journal of Applied Crystallography*, *Journal of Synchrotron Radiation*); however, if you intend to submit to *Acta Crystallographica Section C* or *E* or *IUCrData*, you should make sure that full publication checks are run on the final version of your CIF prior to submission.

#### **Publication of your CIF in other journals**

Please refer to the *Notes for Authors* of the relevant journal for any special instructions relating to CIF submission.

---

**PLATON version of 19/02/2022; check.def file version of 19/02/2022**

Database sheets - clipprod plot

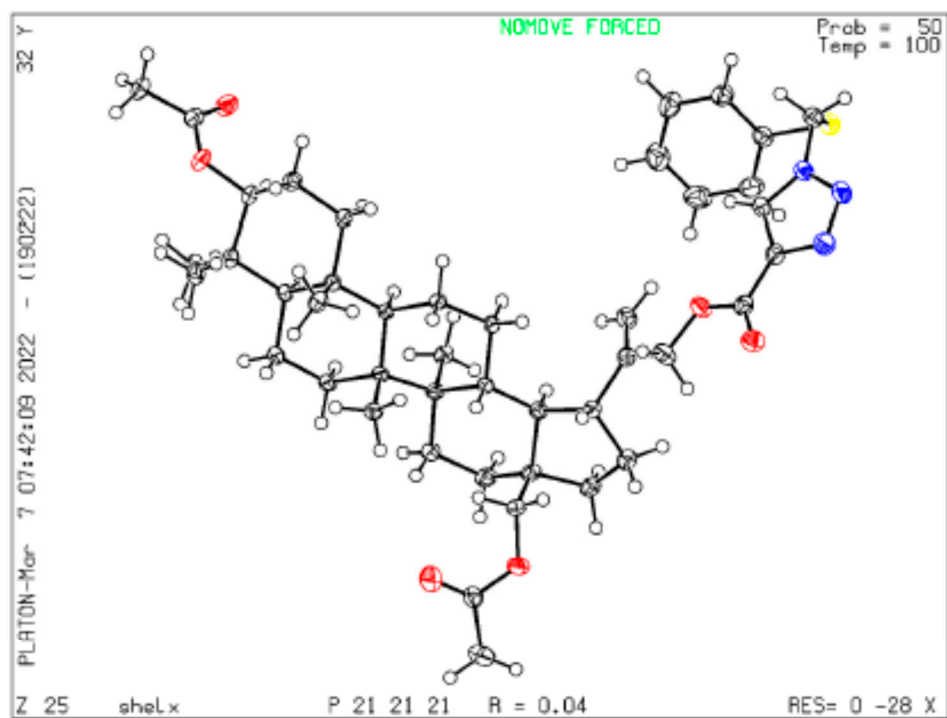

Supplement: s1 [file s1]
